# Supplementary material
Source: PubMed Central journal article supplement (PMC4317563)
Supplement: mmc2.pdf [file mmc2.pdf]

## Article

# Structural Analysis of Adenovirus VAI RNA Defines the Mechanism of Inhibition of PKR

Katherine Launer-Felty,<sup>1</sup> C. Jason Wong,<sup>1</sup> and James L. Cole<sup>1,2,\*</sup><sup>1</sup>Department of Molecular and Cell Biology and <sup>2</sup>Department of Chemistry, University of Connecticut, Storrs, Connecticut

**ABSTRACT** Protein kinase R (PKR) is activated by dsRNA produced during virus replication and plays a major role in the innate immunity response to virus infection. In response, viruses have evolved multiple strategies to evade PKR. Adenovirus virus-associated RNA-I (VAI) is a short, noncoding transcript that functions as an RNA decoy to sequester PKR in an inactive state. VAI consists of an apical stem-loop, a highly structured central domain, and a terminal stem. Chemical probing and mutagenesis demonstrate that the central domain is stabilized by a pseudoknot. A structural model of VAI was obtained from constraints derived from chemical probing and small angle x-ray scattering (SAXS) measurements. VAI adopts a flat, extended conformation with the apical and terminal stems emanating from a protuberance in the center. This model reveals how the apical stem and central domain assemble to produce an extended duplex that is precisely tuned to bind a single PKR monomer with high affinity, thereby inhibiting activation of PKR by viral dsRNA.

## INTRODUCTION

Infection of mammalian cells by viruses triggers the innate immunity response by interaction of viral nucleic acids with the pattern recognition receptors RIG-I, MDA5, and TLR3 (1). These pathways converge in the expression of type 1 interferons. Secreted interferons induce several hundred genes, including key proteins involved in antiviral defense: PKR, RNase L, and MxA. Viruses have evolved diverse mechanisms to evade the innate immunity pathway (2). The crucial role of PKR in this pathway is highlighted by the large number of viruses that disable PKR to promote viral replication (3) and by the rapid evolution of PKR under selective pressure from viruses (4,5).

PKR contains two tandem dsRNA binding domains at the N-terminus and a C-terminal kinase domain connected by a long, unstructured linker. The enzyme is induced in a latent form and is activated by viral dsRNA to phosphorylate the translational initiation factor eIF2 $\alpha$ , leading to arrest of viral protein synthesis in the host cell. PKR activation is mediated by dimerization of the kinase domains (6–8). A minimum of 30 to 33 bp of regular duplex RNA is required to bind two PKR monomers and activate the kinase (9,10), supporting the dimerization model. Secondary structure defects typically impede the ability of dsRNAs to activate PKR (11).

Adenovirus and Epstein-Barr virus each produce noncoding, highly structured RNAs that act as RNA decoys and

sequester PKR but do not activate, thereby allowing viral replication to proceed (3). Adenovirus virus-associated RNA-I (VAI) contains ~160 nt and accumulates to micromolar concentrations late in infection. Enzymatic probing measurements (12,13) reveal a conserved secondary structure consisting of three distinct domains: an apical stem, a highly structured central domain, and a terminal stem (Fig. 1 *a*). The apical stem is the primary PKR site, with some evidence for interaction with the central domain (14–17). Deletion of the entire terminal stem does not affect PKR binding or inhibitor potency (3,18,19). PKR binding stoichiometry and affinity are strongly modulated by divalent ion and a single monomer binds with high affinity to VAI in the presence of Mg<sup>2+</sup> (19). It has been proposed that the central domain is stabilized by a pseudoknot (20,21). Recent small angle x-ray scattering (SAXS) measurements indicate that VAI adopts an extended conformation (22).

In this study, we employ a combination of chemical probing, SAXS, and analytical ultracentrifugation to define a structural model of VAI. VAI is stabilized by a pseudoknot and adopts a flat, extended conformation with the apical and terminal stems emanating from a protuberance in the middle. The apical stem and central domain assemble to produce an extended duplex that is precisely tuned to bind a single PKR monomer with high affinity.

## MATERIALS AND METHODS

PKR was expressed and purified as previously described (23). RNAs were synthesized *in vitro* by T7 RNA polymerase using linearized plasmid templates and purified as previously described (17,19). VAI mutants were

Submitted October 23, 2014, and accepted for publication December 8, 2014.

\*Correspondence: james.cole@uconn.edu

Editor: Lois Pollack.

© 2015 by the Biophysical Society  
0006-3495/15/02/0748/10 \$2.00

<http://dx.doi.org/10.1016/j.bpj.2014.12.014>

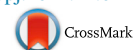

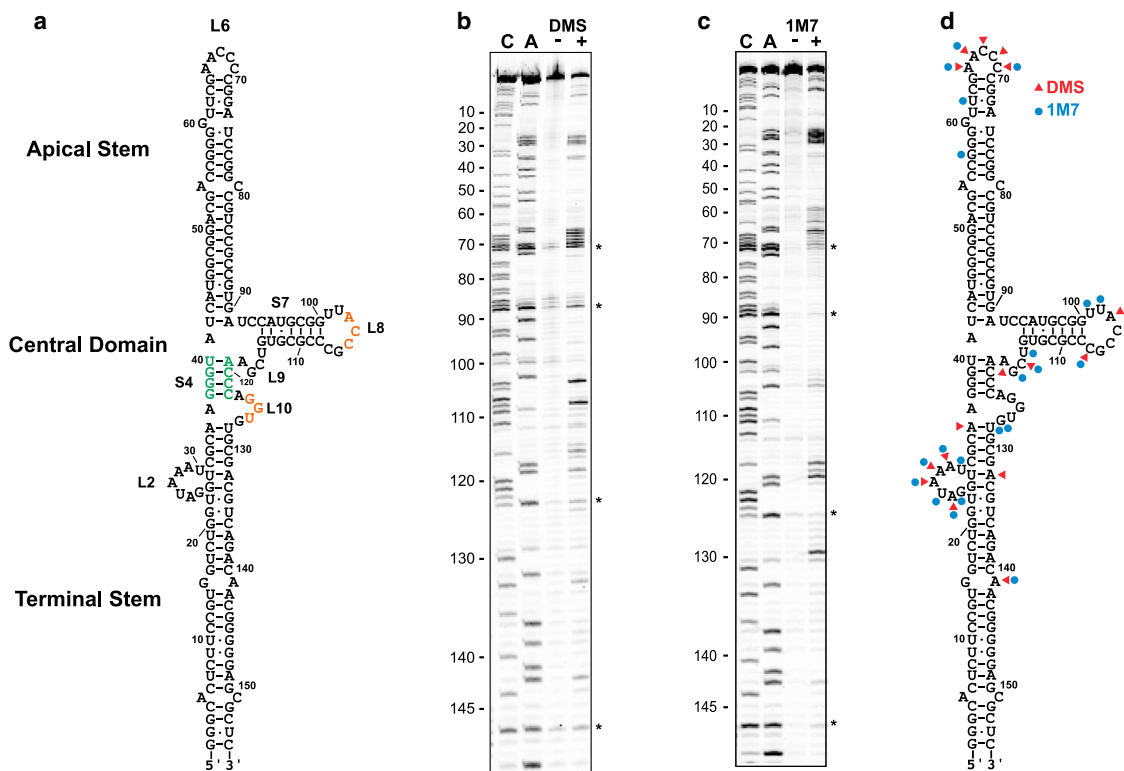

FIGURE 1 Structure probing of VAI. (a) Secondary structure of VAI. The complementary triplets in loops 8 and 10 are depicted in red, and the conserved tetrahelix 4 is depicted in green. (b) DMS probing of VAI structure. The gel includes C and A sequencing ladders, a control lane without DMS (-), and a lane with DMS (+). Artifacts arising from reverse transcriptase pause sites are marked with an asterisk. (c) SHAPE probing of VAI structure. The gel includes C and A sequencing ladders, a control lane without SHAPE reagent (-) and a lane with 1M7 (+). Artifacts arising from reverse transcriptase pause sites are marked with an asterisk. (d) DMS and SHAPE reaction sites mapped onto the secondary structure diagram of VAI. To see this figure in color, go online.

analyzed using the Kinefold (24) structure prediction algorithm to ensure that the mutations did not stabilize alternative folds within the central domain.

## Structure probing

For primer extension assays VAI was inserted into an RNA structure cassette (25). A primer complementary to the 3' region of the cassette containing a 5'-amine was purchased from IDT (Coralville, IA) (5'-AmC6-GAACCGACCGAAGCCCG-3') and labeled with 6-carboxytetramethylrhodamine (6-TAMRA) N-hydroxysuccinimidyl ester. 1-methyl-7-nitroisatoic anhydride (1M7) was synthesized using an established protocol (26). Before DMS modification, RNAs were annealed at 95°C for 3 min in 20 mM phosphate, 0.1 mM EDTA, pH 7.5 and snap-cooled on ice. 200 mM NaCl and 5 mM MgCl<sub>2</sub> were added, and the RNAs were allowed to fold for 30 min at 37°C. RNAs were treated with 38.4 mM of DMS dissolved in ethanol for 15 min at room temperature, and the reactions were quenched by adding 51.8 mM β-mercaptoethanol. Before SHAPE analysis, RNAs were annealed at 95°C for 3 min in 40 mM HEPES, 0.1 mM EDTA, pH 8.0 and snap-cooled on ice. 200 mM NaCl and 5 mM MgCl<sub>2</sub> were added, and the RNAs were allowed to fold for 30 min at 37°C. RNAs were treated with 150 mM of 1M7 dissolved in DMSO for 2 min at 37°C. Samples were ethanol precipitated, dried, and resuspended in 0.5 X TE (5 mM Tris-HCl, 0.5 mM EDTA), pH 8.0. Reverse transcription was performed as previously described (25). Samples were run on 8 M urea sequencing gels containing 8% to 12% acrylamide and immediately imaged on a Typhoon Trio (GE Life Sciences, Piscataway, NJ). Gel images were quantitated using SAFA (27). The data were

normalized to the band corresponding to A65, which was uniformly reactive in all VAI constructs. Reactivities below 0.20 were considered unmodified.

## Structural modeling

SHAPE reactivities were imported into RNAstructure (28), and secondary structures were determined using pseudo-free energy constraints (29) with default settings for the slope and intercept. Ten three-dimensional models of VAI were generated with RNAComposer (30) using the secondary structure constraints generated by RNAstructure. A pseudoknot between loops 8 and 10 was imposed where appropriate. These models were aligned to SAXS envelopes using SUPCOMB (31). The final models were chosen based on a low normalized spatial discrepancy (NSD) and adherence to the structure probing data.

## Analytical ultracentrifugation

PKR binding to VAI was characterized using sedimentation velocity analytical ultracentrifugation as previously described (17,19). Before analytical ultracentrifugation, PKR and VAI constructs were buffer exchanged into 20 mM HEPES, pH 7.5, 200 mM NaCl, 5 mM MgCl<sub>2</sub>, 0.1 mM EDTA, and 0.1 mM TCEP using Biogel P6 spin columns and mixed at several ratios. The data were processed using DCDT+ (32) to produce normalized g(s\*) sedimentation velocity distribution functions. Dissociation constants were determined by global analysis with SEDANAL (33) using a 1:1 binding model. Hydrodynamic parameters were calculated using HYDROPRO (34).

## Small angle x-ray scattering

SAXS data were collected at beamline X9 of the National Synchrotron Radiation Laboratory at Brookhaven National Laboratories. RNA samples at concentrations of 1, 2, and 4 mg/ml were buffer exchanged into 20 mM HEPES, pH 7.5, 200 mM NaCl, 0.1 mM EDTA, 0.1 mM TCEP, and 5% glycerol. Sample homogeneity was verified by sedimentation velocity analysis (see Fig. S1 in Supporting Material).  $MgCl_2$  was added directly before analysis. Samples were filtered through a 0.02  $\mu m$  syringe filter (Anotop) and centrifuged for 5 min at 12,000 RPM immediately before analysis. During data collection, the samples were maintained at 20°C and flowed continuously through a capillary to prevent radiation damage. Analysis of successive frames confirms the absence of radiation damage.

Guinier analysis was performed using the low- $q$  portion of the data where  $R_g \bullet q \leq 1.3$ . The  $p(r)$  pair distribution function was calculated using GNOM (35) with a maximum  $q$  corresponding to  $8/R_g$ .  $D_{Max}$  was determined by the minimum of  $X^2$  as this parameter was incremented. Ab initio bead models were generated using the data collected at 2 mg/ml by simulated annealing using DAMMIF (36). For each structure, 25 simulated annealing runs were performed and the resulting models were superimposed, averaged, and filtered using DAMAVER (37). The mean NSD was calculated for each ensemble:  $0.81 \pm 0.06$  (VAI),  $0.82 \pm 0.03$  (VAI +  $Mg^{2+}$ ),  $0.86 \pm 0.03$  (L8 +  $Mg^{2+}$ ), and  $0.77 \pm 0.04$  ( $\Delta T5$  +  $Mg^{2+}$ ). Surfaces were calculated using *pdb2vol* from SITUS (38).

## RESULTS

### Secondary structure of VAI

Several alternative secondary structures have been reported for VAI based on enzymatic and chemical structure probing and phylogenetic analyses (39,40). Therefore, we used both DMS and SHAPE probing to resolve the base pairing within VAI. The RNA was inserted into a cassette to facilitate analysis by primer extension (25). The pattern of chemical modifications observed in this study is the same as detected in the absence of the cassette (17). As expected, DMS reacts extensively with residues lying within loops 2, 6, and 9 (Fig. 1, *b* and *d*). Interestingly, most of the residues in loops 8 and 10 are protected, consistent with a tertiary interaction in the central domain (20,21). DMS also modifies A132, which lies just above loop 2, and A141, which corresponds to a G-A mismatch in the terminal stem.

Consistent with DMS probing, SHAPE measurements show modification within loops 2, 6, and 9, and protection in loops 8 and 10 (Fig. 1, *c* and *d*). Loop 2 is more reactive in SHAPE relative to DMS because 1M7 reacts with 2'-OH regardless of sequence where DMS selectively modifies adenine and cytosine nucleobases. As observed in DMS probing, A141 modification in SHAPE indicates distortion/flexibility at the G-A mismatch in the terminal stem. Interestingly, loop 6 is protected from 1M7 modification at positions C67-C70. These bases are modified by DMS indicating that this loop is not involved in tertiary interactions. SHAPE is more sensitive to local nucleotide dynamics than DMS probing (41) and the additional protection from 1M7 modification could be because of base stacking interactions within this loop. 1M7 also reacts with G57 in the apical stem. Although this residue lies within the duplex portion of

the apical stem, modification in this region has been previously noted by enzymatic probing (40) suggesting that it may be dynamic or distorted.

The DMS and SHAPE data were jointly used as input for the RNAstructure algorithm (28,29) to produce the secondary structure shown in Fig. 1 *a*. This model generally agrees with one of the secondary structure models of VAI but differs in the apical stem where we detect an alternative pairing and a shorter loop 6, as previously suggested (40).

### Central domain tertiary interactions

Loops 8 and 10 contain complementary ACC and GGU triplet sequences that have the potential to base pair and form a pseudoknot. Replacement of the ACC triplet with UAA in the L8 construct greatly enhances SHAPE modification of residues in loop 8 and remarkably, also induces in extensive modification of loop 10 (Fig. 2). Quantitative analysis reveals reactivities greater than 0.5 in these loops (Fig. 2 *d*), and several nucleotides in loop 10 exhibit SHAPE reactivities greater than 1.5. Mutation of GGU to CCA in L10 also greatly enhances modification in both loops 8 and 10. These data indicate tertiary interactions between these regions. Sedimentation velocity measurements were used to assess the consequences of disruption of this interaction on the affinity of PKR binding to VAI. Titration of wild-type VAI with PKR induces an increase in the sedimentation coefficient of the RNA, consistent with formation of a 1:1 complex (Fig. 2 *c*), and global analysis of these data reveal a  $K_d$  of 334 nM (Fig. 2 *d*). The L8 mutation weakens PKR binding affinity by approximately sixfold, indicating a significant disruption. The L10 mutation is less detrimental, causing a 2.5-fold reduction in binding affinity.

To test whether reconstitution of base pairing between loops 8 and 10 is sufficient to recover the pseudoknot in VAI, we made two additional sets of mutations: L8/L10A and L8/L10B (Fig. 2 *a*). L8/L10A contains the same sequence in loop 8 as L8, but with a complementary UUA triplet in loop 10. L8/L10B contains the same mutation in loop 10 as L10, but with a complementary UGG triplet in loop 8, thus swapping bases between loops 8 and 10. The SHAPE reactivity pattern of L8/L10A is very similar to the L8 mutant and the PKR binding affinity remains about as weak as L8. Thus, mutation of the ACC triplet to UAA in loop 8 cannot be rescued by compensatory A-U base pairing. In contrast, the SHAPE modification pattern and PKR binding affinity of L8/L10B are close to wild-type VAI. Therefore, the identity, but not the orientation, of the base pairs between loops 8 and 10 is important for maintenance of the tertiary structure within the central domain.

The loop 8 and loop 10 mutants all show similar modification within loop 2. However, L8 shows modification in several nucleotides at the periphery of this loop (G20 and U31), but with low intensity. Additional nucleotides extending even further from loop 2 are modified but the intensities

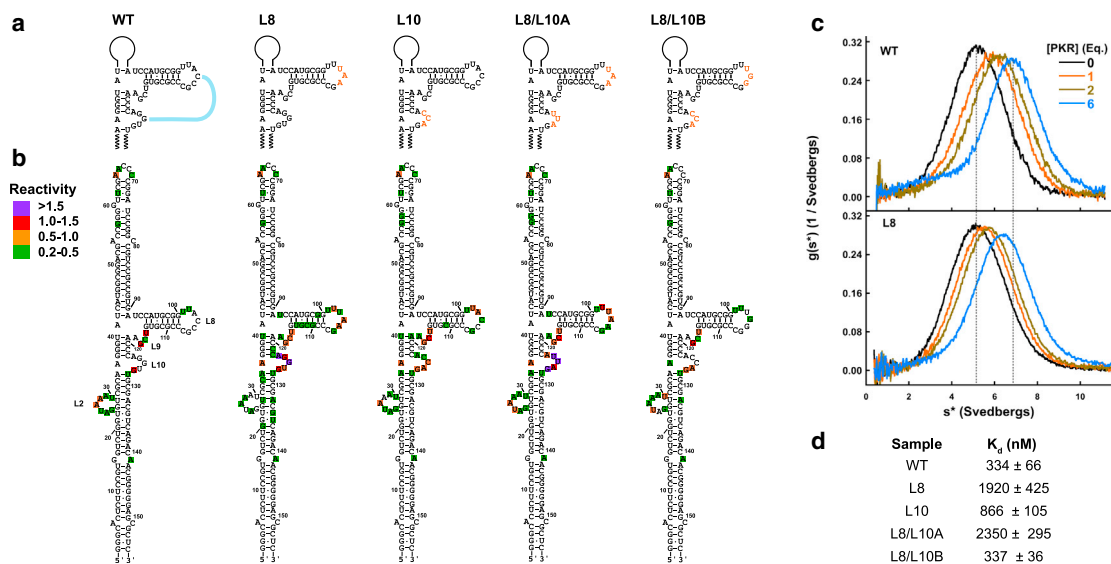

**FIGURE 2** Effect of central domain mutations on VAI structure and PKR binding. (a) Secondary structure of VAI indicating central domain mutations. (b) SHAPE reactivity of central domain mutations. Reactivities were quantitated using SAFA and normalized to the band corresponding to A65. The reactivities are indicated in color scale indicated in the legend. (c) Sedimentation velocity titration of PKR binding to WT (*top*) and L8 (*bottom*) VAI. The data were processed using DCDT+ (32) to produce normalized  $g(s^*)$  sedimentation velocity distribution functions. The shift in the peak maximum upon addition of 6 eq. of PKR to WT VAI is indicated by the dotted lines. The magnitude of the shift is decreased for L8 because of a reduced binding affinity. (d) Dissociation constants for PKR interaction with central domain mutants determined by global analysis using SEDANAL (33). To see this figure in color, go online.

are below the limit of quantitation (0.2 reactivity) used in this study. L8 also shows modification of nucleotides on the complementary strand near loop 2 (A132, G134, and U135). The lower intensity of modifications in this region may indicate a mixture of open and closed conformations. The L2 mutant was prepared to examine the consequences of expansion of loop 2 from positions 20 to 29 (Fig. S2). As predicted, L2 shows extended modification within loop 2 similar to that observed in L8 but does not exhibit the enhanced modification in loops 8 and 10 found in L8. The  $K_d$  for PKR binding to L2 is  $322 \pm 35$  nM, which is similar to wild-type. Therefore, opening of loop 2 does not otherwise alter the tertiary structure or function of VAI.

Because alterations of the triplet in loop 8 produced more dramatic reduction in PKR binding affinity than in loop 10, we prepared additional mutations in this region. The A103U substitution induces fourfold reduction in PKR binding affinity. However, loop 8 remains protected from SHAPE modification with a slight increase in modification of loop 10 relative to the wild-type (Fig. 3). A103U also shows enhanced modification near loop 2 at A132, G134, and U135, similar to the L8 construct (Fig. 2 b). The C105A and C104A/C105A mutations do not significantly alter PKR binding affinity but result in significant modification in loops 8 and 10, indicating disruption of the native tertiary structure. In fact, both of these mutants contain several reactivities within loop 8 and 10 greater than 1.5. Thus, perturbation of tertiary structure in the central domain does not necessarily correlate with changes in PKR interactions.

The pattern of SHAPE modification observed in VAI is preserved in the  $\Delta$ TS construct that lacks loop 2 as well as the rest of the terminal stem (see Fig. S3). Both loops 8 and 10 are protected in wild-type  $\Delta$ TS but are extensively modified in  $\Delta$ TS L8. As observed in full length VAI, the A103U substitution results in only mild enhancement in SHAPE reactivity in loop 10. Thus, the interaction between loops 8 and 10 is preserved in the absence of loop 2 and the terminal stem. Unlike full length VAI, 1M7 modifies nucleotides 84–86 in  $\Delta$ TS and in the  $\Delta$ TS mutants. However, these bases lie within a region of regular duplex and the complementary bases are unmodified. Interestingly, the L8 and A103U mutations do not strongly affect PKR binding to the  $\Delta$ TS construct, with  $K_d$  values of  $155 \pm 24$  nM and  $229 \pm 34$  nM, respectively. Therefore, deletion of loop 2 and the terminal stem eliminates the effect of central domain mutations on PKR interactions.

The central domain of VAI contains a highly conserved tetrahelix. Disruption of this stem abrogates PKR inhibition in vivo and compensatory mutations partially restore function (20). We determined the effects of compensatory base pair substitutions in the central region of this helix on VAI structure. Substitution of the two central G-C base pairs with A-U, individually (S4A and S4B) or together (S4AB), does not cause a significant structural change in the central domain (see Fig. S4). S4B and S4AB both had additional low-level reactivities in nucleotides 123 to 125, and S4B also had a low modification at A103. However, these are subtle differences and do not imply a large



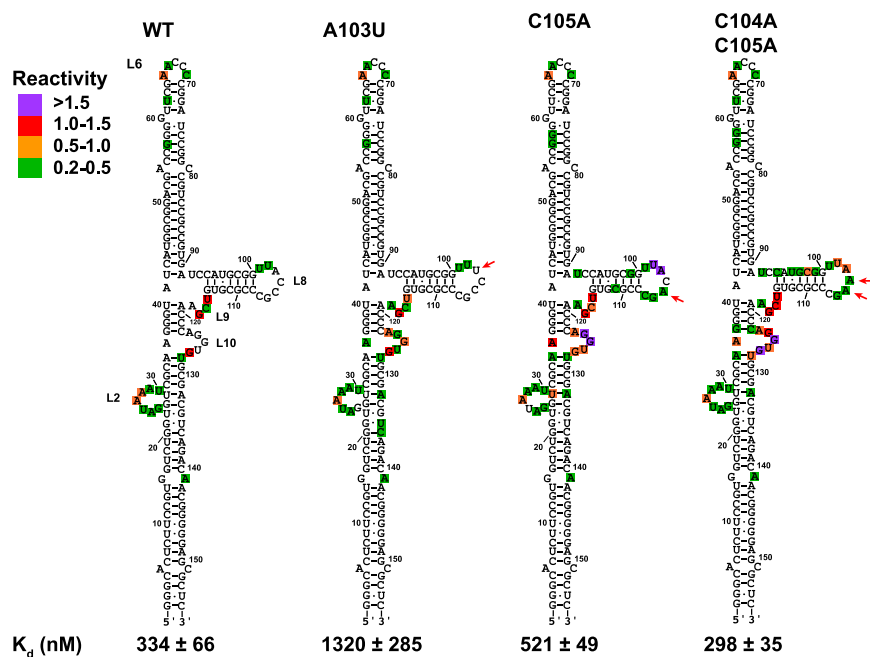

FIGURE 3 Effects of loop 8 mutations on VAI structure and PKR binding. The locations of the mutations are indicated by red arrows. The SHAPE reactivities were quantitated and displayed as indicated in Fig. 2. The dissociation constants were determined by sedimentation velocity analysis. To see this figure in color, go online.

structural change as seen with several of the loop 8 and loop 10 mutants. Thus, the strong sequence conservation within stem 4 is not correlated with structural changes. The PKR binding affinity is not substantially altered in either S4A or S4AB but is approximately threefold reduced in S4B, providing another example of a mutation in the central domain that preserves tertiary structure while inhibiting PKR binding.

### Structural model of VAI

The residue-level constraints from SHAPE and long-distance constraints derived from SAXS analysis were combined to develop a structural model of VAI. Fig. 4 *a* shows SAXS scattering curves for VAI in the presence and absence of  $Mg^{2+}$ . The curves become flat in the low- $q$  range, and the Guinier plots are linear (inset), indicating that the samples are monodisperse and homogeneous. The radius of gyration ( $R_g$ ) of VAI obtained from Guinier analysis is independent of concentration from 1 to 4 mg/ml (see Table S1), indicating the absence of self-association and Kratky plots of  $q^2 \cdot I$  vs.  $q$  exhibit a clear maximum and decrease at high  $q$ , as predicted for a well-ordered macromolecule (for an example, see Fig. S6).

Addition of divalent ion results in an insignificant change in  $R_g$  of VAI from  $45.7 \pm 1.1$  Å (average of three concentrations) to  $47.2 \pm 0.2$  Å, confirming the absence of a substantial structural change induced by  $Mg^{2+}$  (17,19). The  $p(r)$  pair distribution function for VAI shows a characteristic maximum at  $\sim 25$  Å, corresponding to the approximate diameter of an A-form RNA duplex, a shoulder near 55 Å, and a maximum dimension ( $D_{max}$ ) of 160 Å (Fig. 4 *b*).

The distributions for VAI in the presence and absence of  $Mg^{2+}$  are nearly superimposable. The triplet substitution in L8 induces a slight increase in  $R_g$  to  $48.4 \pm 0.1$  Å in the presence of divalent ion and a concomitant enhancement of the contribution of longer distances scattering pairs in the  $p(r)$  curve. However, the maximum dimension is not altered. Thus, disruption of the tertiary interaction between loops 8 and 10 measurably perturbs the global structure of VAI.

Ab initio bead models were constructed from the SAXS data using a simulated annealing procedure (DAMMIF) (36). This approach has been shown to provide accurate low-resolution RNA structures (42–45). VAI has a central bulged region flanked by a short arm and a longer, kinked arm (Fig. 4 *c*). The structure is almost planar, as is commonly observed in smaller RNAs (46). The width of the arms (25 to 30 Å) corresponds to an A-form RNA duplex.  $Mg^{2+}$  does not significantly affect the shape of VAI. Indeed, superposition of structural models derived from eight independent SAXS measurements performed in the presence and absence of divalent ion reveals a remarkably consistent overall shape with a maximum normalized spatial discrepancy (NSD) of only 0.536 (Fig. S5). The longer arm is  $\sim 75$  Å, consistent with the length of RNA duplex present in either the terminal or apical stem.

We assigned these features to the domains of VAI based on SAXS analysis of  $\Delta TS$  VAI. SHAPE demonstrates that the structures of the central domain and apical stems are preserved in  $\Delta TS$  (Fig. S3). This RNA is well folded and homogeneous (Fig. 5). As expected, both  $R_g$  and  $D_{max}$  of the deletion construct are reduced relative to VAI (Table S1). As in the case of VAI, these structural parameters are not significantly changed in the presence of  $Mg^{2+}$  (data not

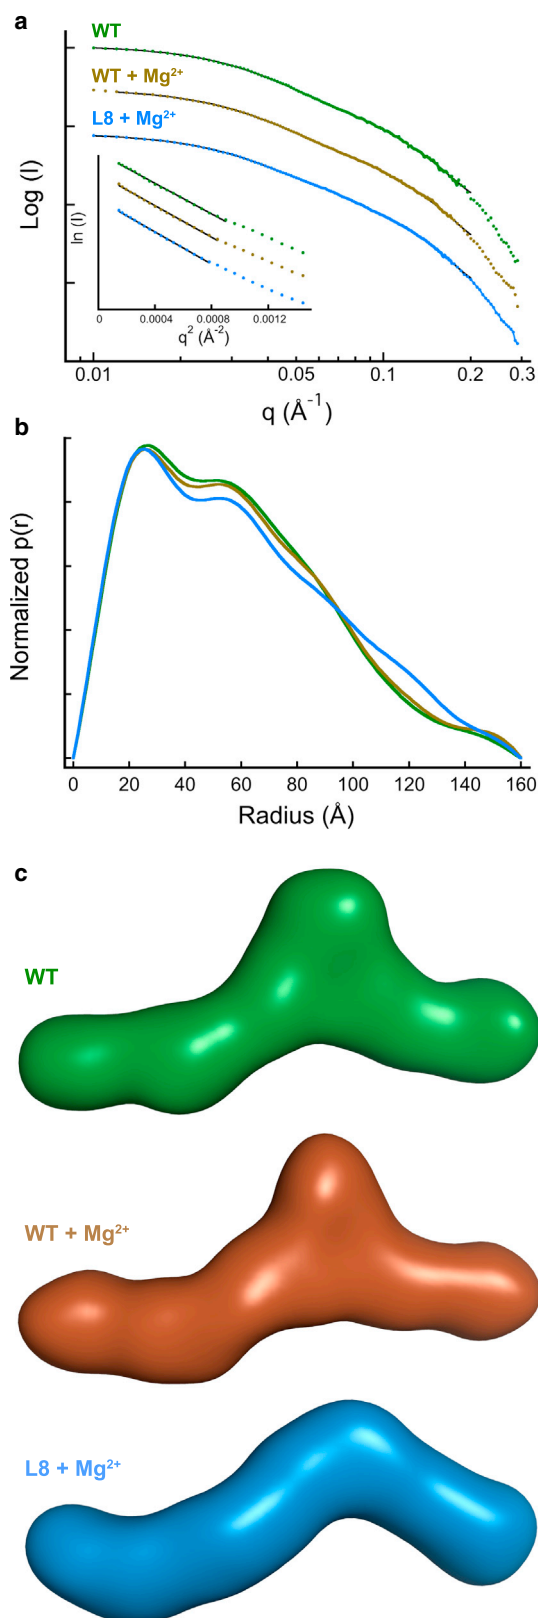

FIGURE 4 SAXS analysis of VAI. (a) SAXS scattering curves for WT (green), WT + Mg<sup>2+</sup> (brown), and L8 + Mg<sup>2+</sup> (blue). The solid black lines show the fits of the data to  $p(r)$  distributions. All samples are at 2.0 mg/ml. Inset: Guinier analysis giving  $R_g$  values of  $44.8 \pm 1.0$  Å (WT),  $45.1 \pm$

shown). The ab initio model of  $\Delta$ TS contains a kinked, helical region and a wide domain but lacks the shorter helix (Fig. 5 c). The bulge present in VAI is also less prominent in  $\Delta$ TS. Thus, the kinked helix in VAI corresponds to the apical stem and the short helix is the terminal stem. Although the central domain resides in the middle of the VAI, the reduction of the size of the bulge in  $\Delta$ TS indicates a contribution from the terminal stem. The atomic models described below support these assignments.

Atomic structures of VAI,  $\Delta$ TS, and L8 were predicted based on the experimental secondary structure constraints from SHAPE analysis using a fragment assembly approach (30). The VAI and  $\Delta$ TS models incorporate the loop 8–loop 10 interaction. The VAI model aligns reasonably well with the bead model, with NSD = 0.884 (Fig. 6 a). However, the scattering predicted from the atomic model of VAI does not superimpose with the experimental scattering, giving rise to an elevated  $\chi^2$  (Fig. S7). We believe that this discrepancy is primarily because of the kink in the apical stem of the ab initio bead model that is not present in the atomic model. Deletion of the pseudoknot constraint resulted in VAI models that did not fit as well, with NSD of  $\sim 0.93$  to 0.95. The alignment of the atomic model confirms our assignment of the VAI domains. Interestingly, the protuberance in the middle of the structure is mainly associated with loop 2. The central domain itself lies below this protuberance and adopts a compact structure. Stem 7 extends out from the three-helix junction and bends sharply to bring loops 8 and 10 in proximity to base pair. In the VAI model predicted by RNAComposer C104–G125 and C105–G124 are paired, but A103–U126 does not pair (Fig. 6 c). At the three-way junction, coaxial stacking of the conserved stem 4 extends the apical stem. The validity of this model is supported by hydrodynamic calculations. The sedimentation coefficient predicted from the atomic model is  $s_{20,w} = 5.53$  S, which agrees well with measured values of 5.55 to 5.59 S. The atomic model for  $\Delta$ TS is similar to VAI and fits the SAXS envelope very well, with NSD = 0.837. The central domain occupies the wider portion of the SAXS envelope. However, the orientation of the model with respect to rotation around the helical axis is not well defined. As in the case of VAI itself, there is good agreement between the predicted ( $s_{20,w} = 4.78$  S) and measured ( $s_{20,w} = 4.59$  S) sedimentation coefficients.

Finally, we generated an atomic model of the L8 mutant. Based on the structure-probing results, the loop 8–loop 10 interactions were not enforced and the size of loop 2 was

$0.1$  Å (WT + Mg<sup>2+</sup>), and  $45.9 \pm 0.7$  Å (L8 + Mg<sup>2+</sup>). The data are vertically offset for clarity. (b)  $p(r)$  distance distribution functions. The distributions were produced using GNOM (35) with a maximum  $q$  corresponding to  $8/R_g$ . (c) Ab initio models generated by simulated annealing using DAMMIF (36). Twenty-five models were superimposed, averaged, and filtered using DAMAVER (37). The bead models were converted to surface representations using SITUS (38). To see this figure in color, go online.

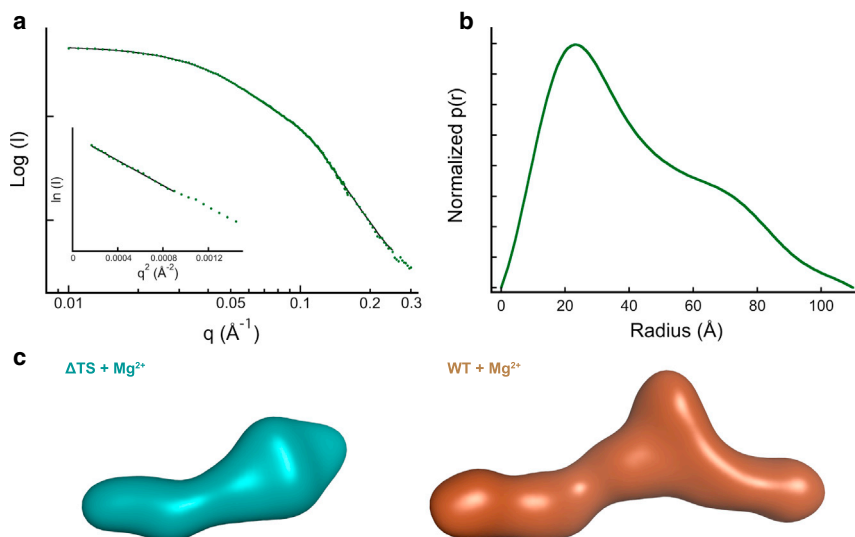

FIGURE 5 SAXS analysis of  $\Delta$ TS VAI. (a) SAXS scattering curves of  $\Delta$ TS VAI. The solid black line shows the fit of the data to a  $p(r)$  distribution. Inset: Guinier analysis giving  $R_g = 32.7 \pm 1.1$   $\text{\AA}$ . (c) Ab initio model of  $\Delta$ TS compared to WT VAI. The bead models were generated by simulated annealing using DAMMIF (36). Twenty-five models were superimposed, averaged, and filtered using DAMAVER (37). The models were converted to surface representations using SITUS (38). To see this figure in color, go online.

increased. Overall, the best fitting model agrees with SAXS results, with an NSD = 0.915. In the resulting model, the orientation of the three-way junction is altered such that stem 7 points toward the protuberance and the terminal stem points downward (Fig. 6 d). Thus, the protuberance is formed from stem 7 rather than the large loop 2, consistent with the reduced size of this feature in the SAXS envelope. Also consistent with the SAXS results, the L8

mutation does not alter the maximum dimension of the atomic model.

## DISCUSSION

PKR binds to dsRNAs as short as 10 to 15 bp but activation requires longer ( $> 30$  to 33 bp) stretches of duplex (9,10). PKR also interacts with highly structured single-stranded

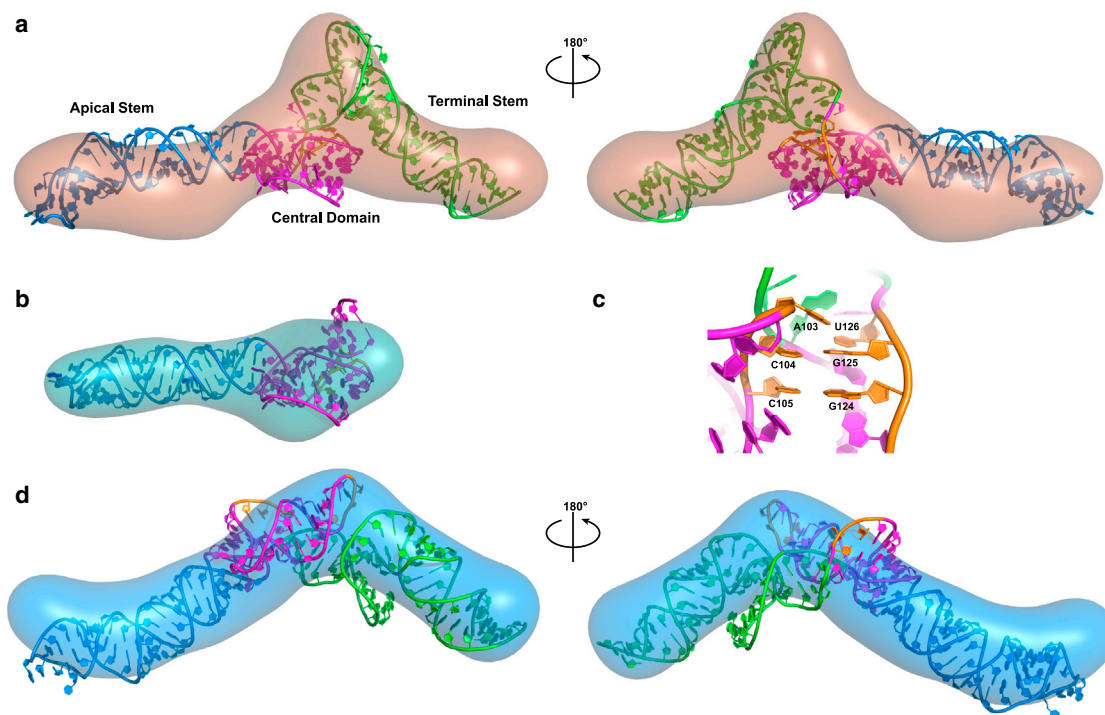

FIGURE 6 Overlay of atomic models with ab initio SAXS models: (a) VAI, (b)  $\Delta$ TS, (c) expanded view of the pseudoknot in VAI, and (d) L8 mutant. Atomic models were generated with RNAComposer (30) using the secondary structure constraints derived from SHAPE analysis. Models are color coded by domain: apical stem (blue), central domain (purple), and terminal stem (green). The pseudoknot is colored gold. The atomic models were aligned with the SAXS envelopes using SUPCOMB (31). To see this figure in color, go online.

RNAs that contain bulges, loops, pseudoknots, and single-stranded tails. It is believed that activation by such RNAs containing complex secondary and tertiary structures is mediated by assembly of long double-stranded elements by dimerization, coaxial stacking, mimicry of canonical A-form dsRNA, and inclusion of symmetrical defects (11). However, the structural principles by which RNA inhibitors of PKR mediate high-affinity binding without activating the kinase are not as well understood.

Using a combination of chemical probing, SAXS and structure prediction algorithms, we have developed a three-dimensional structural model for VAI that is consistent with previous biochemical data and provides insights in the mechanism by which this complex RNA interacts with PKR. Chemical probing data indicates that the central domain is stabilized by a pseudoknot between loops 8 and 10. In other adenovirus serotypes, nucleotides within loop 10 are also protected from single-stranded nucleases and phylogenetic and secondary structure analysis indicates that the loop 8-loop 10 interaction is conserved across all adenovirus VAI RNAs (39). The RNA adopts a flat, extended conformation with the apical and terminal stems emanating from a protuberance in the middle that is comprised of the central domain and a large, single-stranded loop. A key feature in the structure is coaxial stacking of the apical stem onto stem 4 in the central domain.

Recently, Conn and coworkers also detected a pseudoknot in the central domain where the tertiary structure is stabilized at low pH, low temperature, and in the presence of  $Mg^{2+}$  (21). In contrast, we find that the SAXS structure (Fig. 4) and reactivity in loops 8 and 10 (data not shown) are not sensitive to divalent ion. A recent SAXS analysis of VAI (22) reported hydrodynamic parameters similar to those reported in this study. The overall shape of VAI is similar to that shown in Fig. 4 but the domains were not assigned. The shape of  $\Delta TS$  deduced by Džananović et al. (22) is quite different from our model, and their alignment of an atomic model for  $\Delta TS$  within the SAXS envelope results in an orientation of the 5'- and 3'-ends that is incompatible with the structure of full-length VAI.

Our detailed analyses of PKR interactions with VAI (17,19) supports a model whereby VAI functions as an inhibitor by binding a single monomer, thereby preventing dimerization of PKR on the RNA and subsequent activation. VAI contains two stems of ~20 bp, each of which should be capable of binding a PKR. Indeed, when expressed as isolated domains, the terminal stem (17) and apical stem (17,47) each bind one PKR with weak affinity. In the context of full-length VAI, the portion of the terminal stem proximal to the central domain is occluded by stem 7 (Fig. 6 a), which would impede its ability to bind PKR. In contrast, the apical stem is accessible to interaction with PKR. Footprinting and affinity cleavage studies indicate that the apical stem represents the primary binding site for PKR (14–16). The structure also rationalizes the observation that the apical stem

and central domain cooperatively interact to form a high-affinity PKR binding site (17). As expected for a nonsequence-specific interaction, the affinity of PKR binding increases with the length of dsRNA (48–50). In the atomic model, stem 4 in the central can coaxially stack onto the apical stem, resulting in an effectively longer duplex. Consistent with this model, affinity cleavage reveals that stem 4 in the central domain is a secondary PKR binding site (15).

The native tertiary structure in the central domain is not required for high-affinity PKR binding. Some mutations that disrupt the pseudoknot—C105A, C104A/C105A—do not substantially alter PKR binding. This observation is consistent with our proposal that the high-affinity PKR binding site is formed from the conserved stem 4 and the apical stem. This motif is predicted to be largely unaffected by disruption of the pseudoknot (Fig. 6 d). Alternative functions for the tertiary structure in the central domain may include protecting VAI from cleavage or regulating the interaction of VAI structures or sequences with RNA binding proteins other than PKR (21). In this regard, VAI is reported to serve as a substrate for dicer (51,52) and to function as an activator of oligoadenylate synthetase (53,54).

Several mutations within the central domain significantly inhibit PKR binding without inducing substantial structural rearrangements. The A103U substitution in loop 8 reduces binding without affecting the loop 8-loop 10 interactions. It also inhibits binding in the context of L8 and L8/L10A, where the pseudoknot is disrupted. However, wild-type PKR binding affinity is recovered in L8/L10B where a complementary adenosine is provided in loop 10. Because PKR binding is not sensitive to the presence of the loop 8-loop 10 pseudoknot, it appears unlikely that A103 is directly recognized by PKR. Instead, we propose that mutations at this position result in a conformational change in another region of VAI that impedes PKR binding. A reasonable candidate is the large, single-stranded loop 2. This model is supported by the observations that the SHAPE reactivity of this loop is perturbed by the L8 and A103U mutations and SAXS indicates a substantial rearrangement in loop 2 in the L8 construct. Also, these mutations do not affect PKR binding in the context of the terminal stem deletion construct  $\Delta TS$ , where loop 2 is not present (see Fig. S3).

Conn and coworkers also found that PKR binding and inhibition by VAI are not dependent on the native tertiary structure within the central domain of VAI (21). Binding and PKR inhibition were not affected upon complete removal of loop 10 and substantial reduction in affinity required larger truncations within the 5'-half of the central domain. However, these studies were performed with a truncated RNA construct lacking the terminal stem (analogous to  $\Delta TS$ ) with a six-nucleotide deletion in the apical stem. Our analysis indicates that the effects of central domain mutations on PKR binding to  $\Delta TS$  do not reflect the behavior of intact VAI.



Our study reveals that VAI has evolved to bind PKR with maximal affinity while avoiding activation of the kinase. As expected for a nonsequence-specific protein-nucleic acid interaction, PKR binding affinity and stoichiometry increase with the length of duplex RNA (9,48,49). The isolated apical stem-loop binds PKR fairly weakly ( $K_d = 1.7 \mu\text{M}$ ) (17). Extension of the duplex region to 26 bp by stacking of stem 4 in VAI enhances PKR affinity by sixfold. Further enhancement of PKR binding to VAI by extension of the lattice is precluded because dsRNAs of 30 to 33 bp or longer induce activation (9,10). Given this limitation in binding affinity, accumulation of VAI to micromolar concentrations in the cell late in infection ensures that it effectively competes with activating viral RNAs to prevent kinase activation. The strategy employed by VAI may extend to other RNA inhibitors of PKR (3). The EBER-1 RNA produced by Epstein-Barr virus also inhibits PKR and has complex secondary structure that may fold to yield a similar length PKR binding duplex.

## SUPPORTING MATERIAL

Seven figures and one table are available at [http://www.biophysj.org/biophysj/supplemental/S0006-3495\(14\)04759-6](http://www.biophysj.org/biophysj/supplemental/S0006-3495(14)04759-6).

## AUTHOR CONTRIBUTIONS

K. L. F. performed biophysical and biochemical experiments, generated atomic models, and simulated hydrodynamic parameters. C. J. W., K. L. F., and J. L. C. collected SAXS data, and C. J. W. and J. L. C. analyzed it. K. L. F. and J. L. C. wrote the manuscript, and all authors reviewed it.

## ACKNOWLEDGMENTS

This work was supported by grant number AI-53615 from the NIH to J. L. C. Use of the National Synchrotron Light Source, Brookhaven National Laboratory, was supported by the U.S. Department of Energy, Office of Science, Office of Basic Energy Sciences, under Contract No. DE-AC02-98CH10886. We thank Drs. Marc Allaire and Lin Yang from NSLS X9 for beamline access and technical support. We also thank Drs. Mark Pecuh and Jaideep Saha for assistance in the synthesis of 1M7 for SHAPE analyses. The plasmid cassette for structure probing was a generous gift of Dr. Graeme Conn.

## SUPPORTING CITATIONS

References (55–58) appear in the Supporting Material.

## REFERENCES

- Gürtler, C., and A. G. Bowie. 2013. Innate immune detection of microbial nucleic acids. *Trends Microbiol.* 21:413–420.
- Bowie, A. G., and L. Unterholzner. 2008. Viral evasion and subversion of pattern-recognition receptor signalling. *Nat. Rev. Immunol.* 8:911–922.
- Langland, J. O., J. M. Cameron, ..., B. L. Jacobs. 2006. Inhibition of PKR by RNA and DNA viruses. *Virus Res.* 119:100–110.
- Rothenburg, S., E. J. Seo, ..., K. Dittmar. 2009. Rapid evolution of protein kinase PKR alters sensitivity to viral inhibitors. *Nat. Struct. Mol. Biol.* 16:63–70.
- Elde, N. C., S. J. Child, ..., H. S. Malik. 2009. Protein kinase R reveals an evolutionary model for defeating viral mimicry. *Nature.* 457:485–489.
- Cole, J. L. 2007. Activation of PKR: an open and shut case? *Trends Biochem. Sci.* 32:57–62.
- Dar, A. C., T. E. Dever, and F. Sicheri. 2005. Higher-order substrate recognition of eIF2 $\alpha$  by the RNA-dependent protein kinase PKR. *Cell.* 122:887–900.
- Dey, M., C. Cao, ..., T. E. Dever. 2005. Mechanistic link between PKR dimerization, autophosphorylation, and eIF2 $\alpha$  substrate recognition. *Cell.* 122:901–913.
- Manche, L., S. R. Green, ..., M. B. Mathews. 1992. Interactions between double-stranded RNA regulators and the protein kinase DAI. *Mol. Cell. Biol.* 12:5238–5248.
- Lemaire, P. A., E. Anderson, ..., J. L. Cole. 2008. Mechanism of PKR activation by dsRNA. *J. Mol. Biol.* 381:351–360.
- Nallagatla, S. R., R. Toroney, and P. C. Bevilacqua. 2011. Regulation of innate immunity through RNA structure and the protein kinase PKR. *Curr. Opin. Struct. Biol.* 21:119–127.
- Mellits, K. H., M. Kostura, and M. B. Mathews. 1990. Interaction of adenovirus VA RNA1 with the protein kinase DAI: nonequivalence of binding and function. *Cell.* 61:843–852.
- Furtado, M. R., S. Subramanian, ..., B. Thimmappaya. 1989. Functional dissection of adenovirus VAI RNA. *J. Virol.* 63:3423–3434.
- Clarke, P. A., and M. B. Mathews. 1995. Interactions between the double-stranded RNA binding motif and RNA: definition of the binding site for the interferon-induced protein kinase DAI (PKR) on adenovirus VA RNA. *RNA.* 1:7–20.
- Spangord, R. J., and P. A. Beal. 2001. Selective binding by the RNA binding domain of PKR revealed by affinity cleavage. *Biochemistry.* 40:4272–4280.
- Spangord, R. J., M. Vuyisich, and P. A. Beal. 2002. Identification of binding sites for both dsRBMs of PKR on kinase-activating and kinase-inhibiting RNA ligands. *Biochemistry.* 41:4511–4520.
- Launer-Felty, K., and J. L. Cole. 2014. Domain interactions in adenovirus VAI RNA mediate high-affinity PKR binding. *J. Mol. Biol.* 426:1285–1295.
- Wahid, A. M., V. K. Coventry, and G. L. Conn. 2008. Systematic deletion of the adenovirus-associated RNAI terminal stem reveals a surprisingly active RNA inhibitor of double-stranded RNA-activated protein kinase. *J. Biol. Chem.* 283:17485–17493.
- Launer-Felty, K., C. J. Wong, ..., J. L. Cole. 2010. Magnesium-dependent interaction of PKR with adenovirus VAI. *J. Mol. Biol.* 402:638–644.
- Ma, Y., and M. B. Mathews. 1996. Secondary and tertiary structure in the central domain of adenovirus type 2 VA RNA I. *RNA.* 2:937–951.
- Wilson, J. L., V. K. Vachon, ..., G. L. Conn. 2014. Dissection of the adenoviral VA RNAI central domain structure reveals minimum requirements for RNA-mediated inhibition of PKR. *J. Biol. Chem.* 289:23233–23245.
- Dzananovic, E., T. R. Patel, ..., S. A. McKenna. 2014. Solution conformation of adenovirus virus associated RNA-I and its interaction with PKR. *J. Struct. Biol.* 185:48–57.
- Anderson, E., W. S. Pierre-Louis, ..., J. L. Cole. 2011. Heparin activates PKR by inducing dimerization. *J. Mol. Biol.* 413:973–984.
- Xayaphoummine, A., T. Bucher, and H. Isambert. 2005. Kinfold web server for RNA/DNA folding path and structure prediction including pseudoknots and knots. *Nucleic Acids Res.* 33:W605–W610.
- Wilkinson, K. A., E. J. Merino, and K. M. Weeks. 2006. Selective 2'-hydroxyl acylation analyzed by primer extension (SHAPE): quantitative RNA structure analysis at single nucleotide resolution. *Nat. Protoc.* 1:1610–1616.

26. Mortimer, S. A., and K. M. Weeks. 2007. A fast-acting reagent for accurate analysis of RNA secondary and tertiary structure by SHAPE chemistry. *J. Am. Chem. Soc.* 129:4144–4145.
27. Das, R., A. Laederach, ..., R. B. Altman. 2005. SAFA: semi-automated footprinting analysis software for high-throughput quantification of nucleic acid footprinting experiments. *RNA*. 11:344–354.
28. Reuter, J. S., and D. H. Mathews. 2010. RNAstructure: software for RNA secondary structure prediction and analysis. *BMC Bioinformatics*. 11:129.
29. Low, J. T., and K. M. Weeks. 2010. SHAPE-directed RNA secondary structure prediction. *Methods*. 52:150–158.
30. Popenda, M., M. Szachniuk, ..., R. W. Adamiak. 2012. Automated 3D structure composition for large RNAs. *Nucleic Acids Res.* 40:e112.
31. Kozin, M. B., and D. I. Svergun. 2001. Automated matching of high- and low-resolution structural models. *J. Appl. Crystallogr.* 34:33–41.
32. Philo, J. S. 2006. Improved methods for fitting sedimentation coefficient distributions derived by time-derivative techniques. *Anal. Biochem.* 354:238–246.
33. Stafford, W. F., and P. J. Sherwood. 2004. Analysis of heterologous interacting systems by sedimentation velocity: curve fitting algorithms for estimation of sedimentation coefficients, equilibrium and kinetic constants. *Biophys. Chem.* 108:231–243.
34. García De La Torre, J., M. L. Huertas, and B. Carrasco. 2000. Calculation of hydrodynamic properties of globular proteins from their atomic-level structure. *Biophys. J.* 78:719–730.
35. Semenyuk, A. V., and D. I. Svergun. 1991. GNOM—a program package for small-angle scattering data processing. *J. Appl. Crystallogr.* 24:537–540.
36. Franke, D., and D. I. Svergun. 2009. DAMMIF, a program for rapid *ab-initio* shape determination in small-angle scattering. *J. Appl. Crystallogr.* 42:342–346.
37. Volkov, V. V., and D. I. Svergun. 2003. Uniqueness of *ab initio* shape determination in small-angle scattering. *J. Appl. Crystallogr.* 36:860–864.
38. Wriggers, W. 2012. Conventions and workflows for using Situs. *Acta Crystallogr. D Biol. Crystallogr.* 68:344–351.
39. Ma, Y., and M. B. Mathews. 1996. Structure, function, and evolution of adenovirus-associated RNA: a phylogenetic approach. *J. Virol.* 70:5083–5099.
40. Wahid, A. M., V. K. Coventry, and G. L. Conn. 2009. The PKR-binding domain of adenovirus VA RNAI exists as a mixture of two functionally non-equivalent structures. *Nucleic Acids Res.* 37:5830–5837.
41. Weeks, K. M. 2010. Advances in RNA structure analysis by chemical probing. *Curr. Opin. Struct. Biol.* 20:295–304.
42. Burke, J. E., and S. E. Butcher. 2012. Nucleic acid structure characterization by small angle X-ray scattering (SAXS). In *Current Protocols in Nucleic Acid Chemistry*. Serge L. Beaucage, ..., editors. John Wiley & Sons, Inc..
43. Rambo, R. P., and J. A. Tainer. 2010. Improving small-angle x-ray scattering data for structural analyses of the RNA world. *RNA*. 16:638–646.
44. Fang, X., J. Wang, ..., Y. X. Wang. 2013. An unusual topological structure of the HIV-1 Rev response element. *Cell*. 155:594–605.
45. Lipfert, J., V. B. Chu, ..., S. Doniach. 2007. Low-resolution models for nucleic acids from small-angle x-ray scattering with applications to electrostatic modeling. *J. Appl. Crystallogr.* 40:s229–s234.
46. Reiter, N. J., C. W. Chan, and A. Mondragón. 2011. Emerging structural themes in large RNA molecules. *Curr. Opin. Struct. Biol.* 21:319–326.
47. McKenna, S. A., I. Kim, ..., J. D. Puglisi. 2006. Uncoupling of RNA binding and PKR kinase activation by viral inhibitor RNAs. *J. Mol. Biol.* 358:1270–1285.
48. Ucci, J. W., Y. Kobayashi, ..., J. L. Cole. 2007. Mechanism of interaction of the double-stranded RNA (dsRNA) binding domain of protein kinase R with short dsRNA sequences. *Biochemistry*. 46:55–65.
49. Husain, B., I. Mukerji, and J. L. Cole. 2012. Analysis of high-affinity binding of protein kinase R to double-stranded RNA. *Biochemistry*. 51:8764–8770.
50. Schmedt, C., S. R. Green, ..., M. B. Mathews. 1995. Functional characterization of the RNA-binding domain and motif of the double-stranded RNA-dependent protein kinase DAI (PKR). *J. Mol. Biol.* 249:29–44.
51. Andersson, M. G., P. C. J. Haasnoot, ..., G. Akusjärvi. 2005. Suppression of RNA interference by adenovirus virus-associated RNA. *J. Virol.* 79:9556–9565.
52. Lu, S., and B. R. Cullen. 2004. Adenovirus VA1 noncoding RNA can inhibit small interfering RNA and MicroRNA biogenesis. *J. Virol.* 78:12868–12876.
53. Desai, S. Y., R. C. Patel, ..., B. Thimmapaya. 1995. Activation of interferon-inducible 2'-5' oligoadenylate synthetase by adenoviral VAI RNA. *J. Biol. Chem.* 270:3454–3461.
54. Meng, H., S. Deo, ..., S. A. McKenna. 2012. Regulation of the interferon-inducible 2'-5'-oligoadenylate synthetases by adenovirus VA(I) RNA. *J. Mol. Biol.* 422:635–649.
55. Schuck, P. 2000. Size-distribution analysis of macromolecules by sedimentation velocity ultracentrifugation and lamm equation modeling. *Biophys. J.* 78:1606–1619.
56. Svergun, D., C. Barberato, and M. H. J. Koch. 1995. CRYSOLE—a program to evaluate x-ray solution scattering of biological macromolecules from atomic coordinates. *J. Appl. Crystallogr.* 28:768–773.
57. Trabuco, L. G., E. Villa, ..., K. Schulten. 2008. Flexible fitting of atomic structures into electron microscopy maps using molecular dynamics. *Structure*. 16:673–683.
58. Petoukhov, M. V., D. Franke, ..., D. I. Svergun. 2012. New developments in the ATSAS program package for small-angle scattering data analysis. *J. Appl. Cryst.* 45:342–350.

**Supporting Material for**

**Structural analysis of adenovirus VAI RNA defines  
the mechanism of inhibition of PKR**

Katherine Launer-Felty<sup>1</sup>, C. Jason Wong<sup>1</sup>, and James L. Cole<sup>1,2\*</sup>

<sup>1</sup>Department of Molecular and Cell Biology and <sup>2</sup>Department of Chemistry

University of Connecticut, Storrs, Connecticut 06269, USA

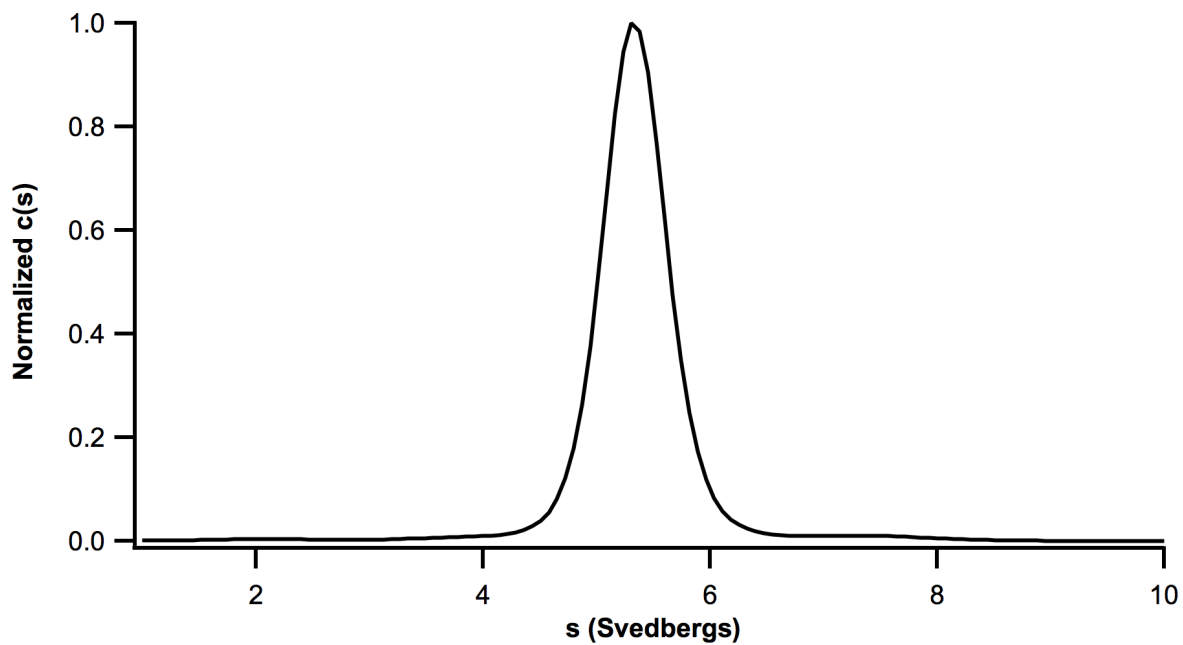

**Figure S1. Sedimentation velocity analysis of VAI.** VAI was analyzed in AU200 buffer by sedimentation velocity analytical ultracentrifugation. The data were processed using SEDFIT (1) to produce a  $c(s)$  distribution. A single species is detected, indicating homogeneity. The peak maximum at  $\sim 5$  S corresponds to the sedimentation coefficient of a VAI monomer (2). Conditions: rotor speed, 35,000 RPM; temperature, 20 °C.



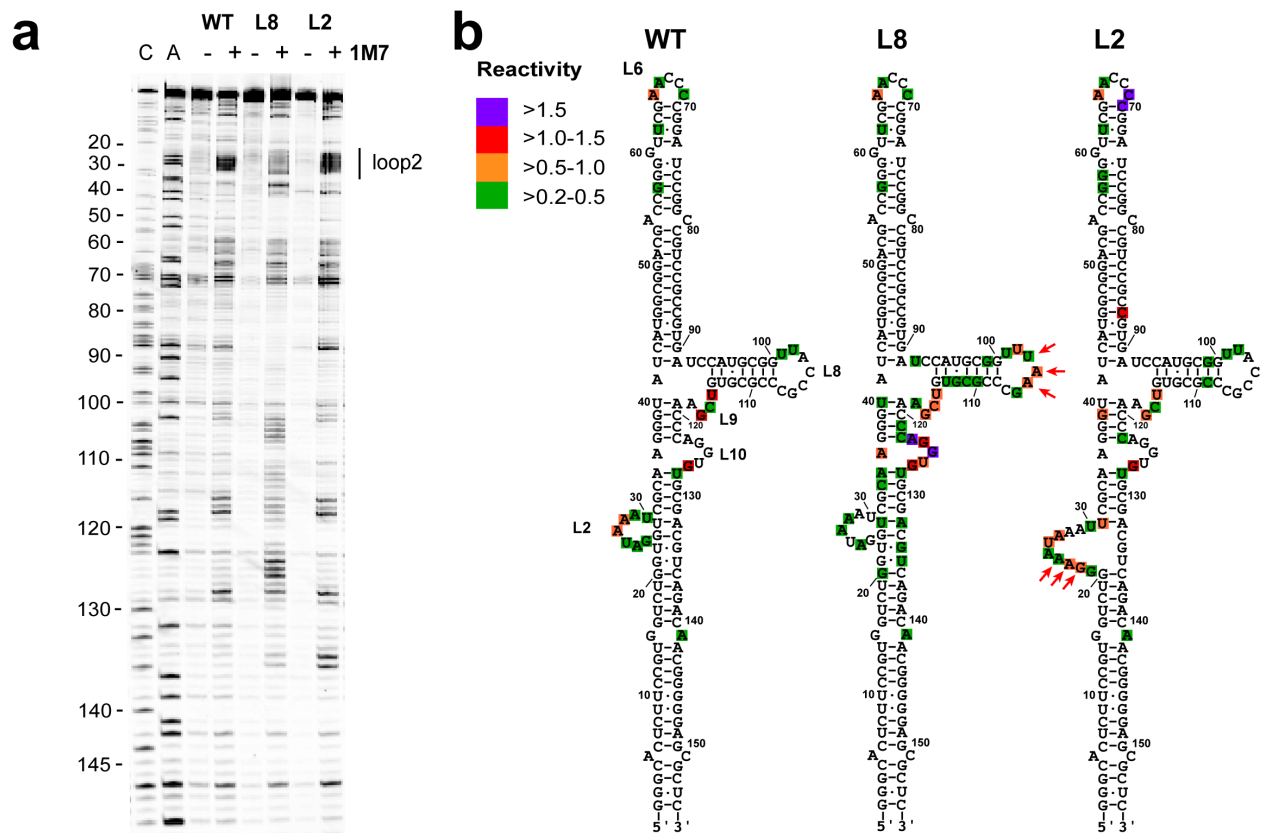

**Figure S2. SHAPE analysis of the L2 mutant of VAI.** a) SHAPE probing of VAI structure. The gel includes C and A sequencing ladders, a control lane without SHAPE reagent (-) and a lane with 1M7 (+). The L8 mutant is included for comparison. Loop 2 is marked on right side of gel. b) SHAPE reactivity. The locations of the mutations are indicated by red arrows. Reactivities were quantitated using SAFA (3) and normalized to the band corresponding to A65. The reactivities are indicated in color scale indicated in the legend.

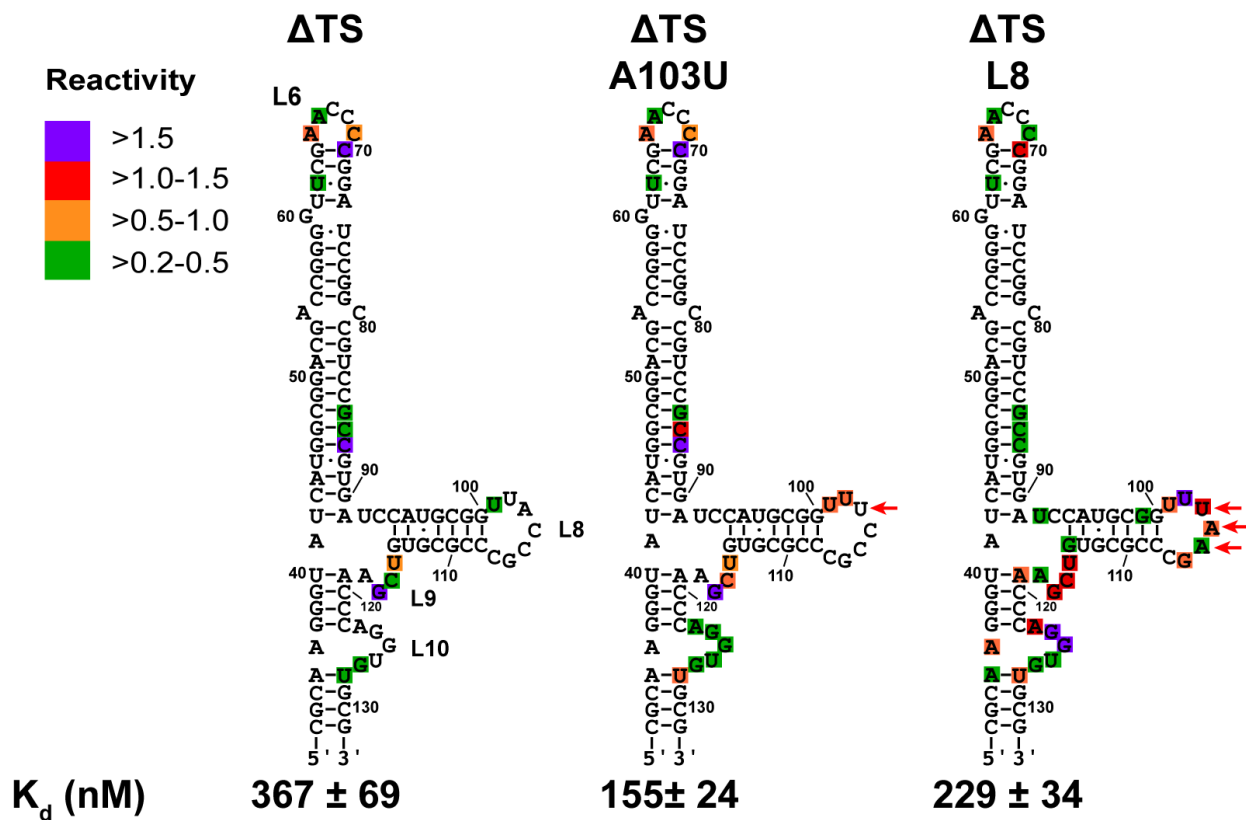

**Figure S3. Analysis of  $\Delta$ TS VAI mutants.** The locations of the mutations are indicated by red arrows. The shape reactivities were quantitated using SAFA(3) and normalized to the band corresponding to A65. The reactivities are indicated in color scale indicated in the legend. The dissociation constants for PKR interaction were determined by sedimentation velocity analysis using SEDANAL (4).

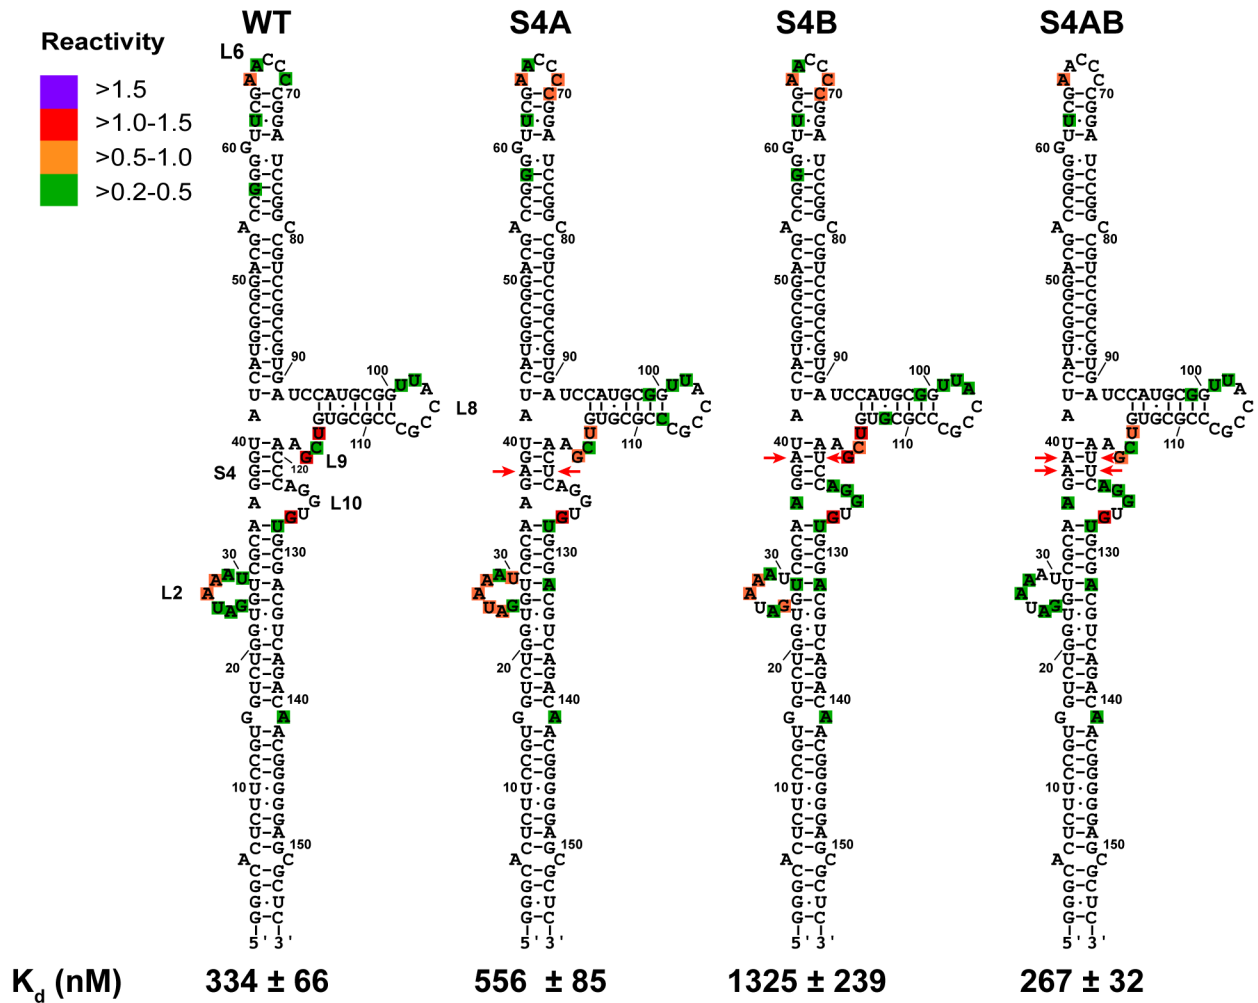

**Figure S4. Analysis of stem 4 mutants.** The locations of the mutations are indicated by red arrows. The shape reactivities were quantitated using SAFA(3) and normalized to the band corresponding to A65. The reactivities are indicated in color scale indicated in the legend. The dissociation constants for PKR interaction were determined by sedimentation velocity analysis using SEDANAL (4).

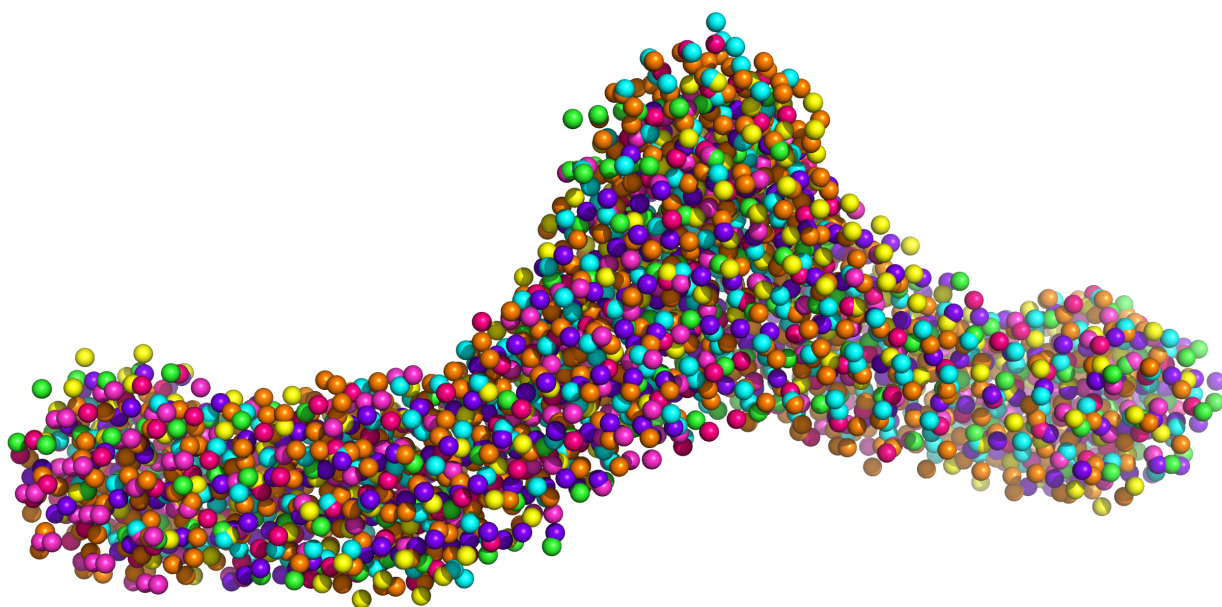

**Figure S5. Superposition of *ab initio* structural models of VAI.** *Ab initio* structural models were constructed using DAMMIF (5) for eight independent SAXS data sets collected at 1, 2 and 4 mg/ml VAI in the absence and presence of  $Mg^{2+}$ . For each structure, 25 simulated annealing runs were performed and the resulting models were superimposed, averaged and filtered using DAMAVER (6). The resulting dummy-atom models were superimposed using SUPCOMB (7) and are depicted as beads of different colors. The maximal normalized spatial discrepancy (NSD) within the group is 0.536.



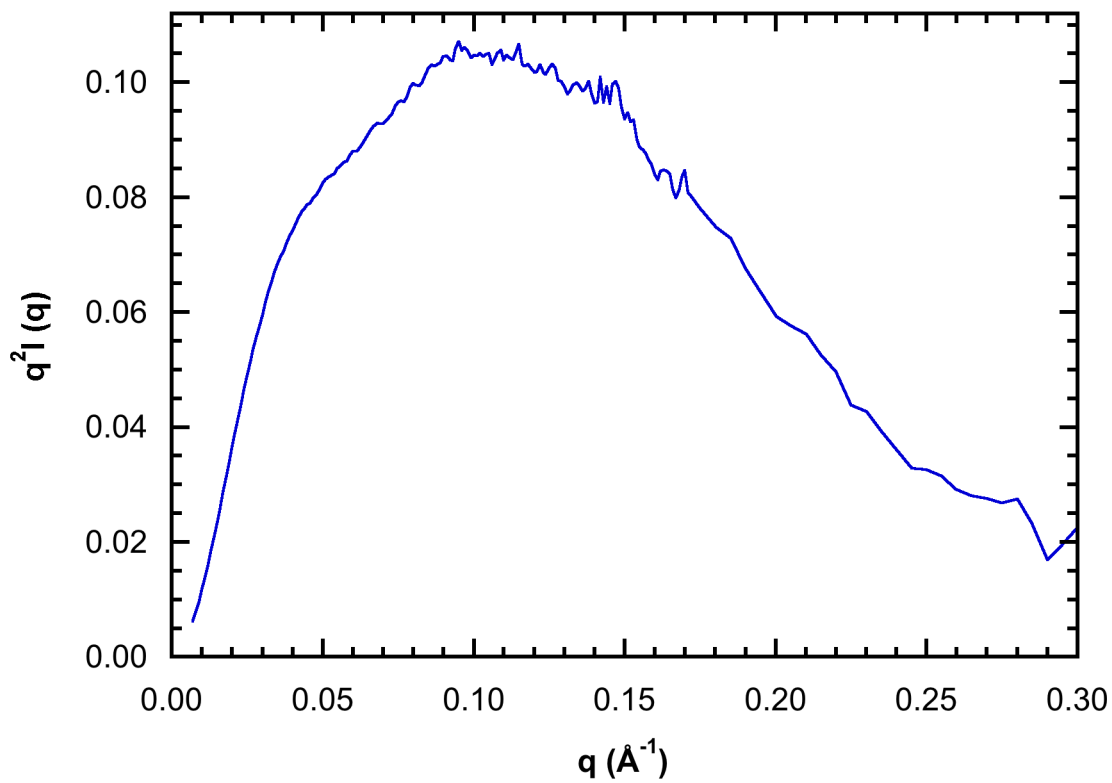

**Figure S6. Kratky plot.** Scattering data for 2 mg/ml VAl + Mg<sup>2+</sup> weighted by  $q^2$ . The plot exhibits a clear maximum and decrease at high  $q$ , as predicted for a well-ordered macromolecule.

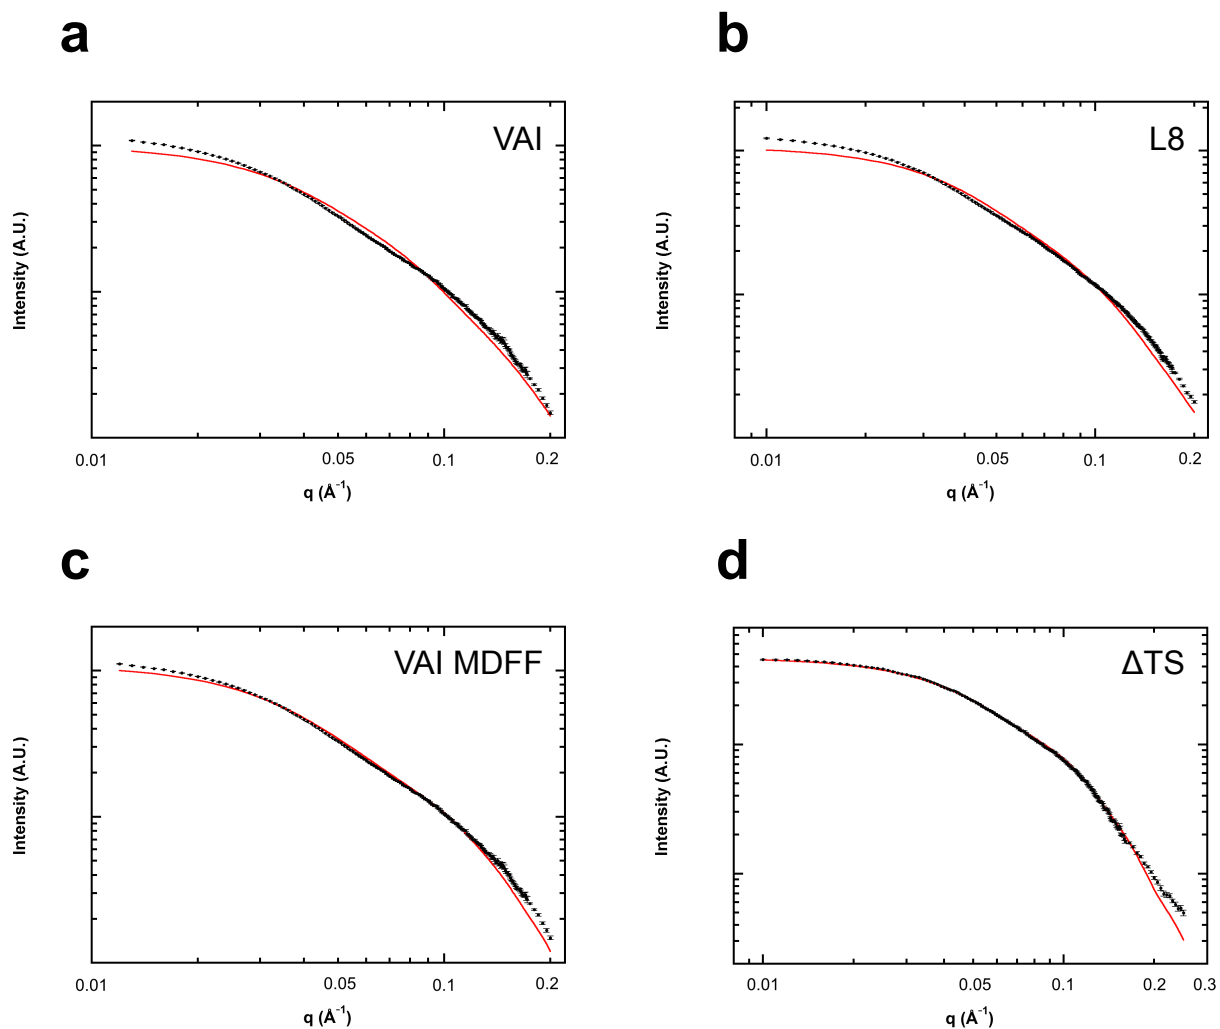

**Figure S7. Predicted scattering of atomic models.** Scattering curves (red lines) were calculated from the atomic models using CRY SOL(8) and superimposed on the experimental data (black points). a) VAI, b) L8, c) VAI model refined using MDFF (9), d)  $\Delta$ TS. The reduced  $\chi^2$  values are 22.34 (VAI), 21.57 (L8), 11.56 (VAI refined using MDFF) and 3.27 ( $\Delta$ TS).

**Table S1. Parameters derived from SAXS analysis of VAI.**

| RNA                    | Conc. (mg/ml) | $R_g$ , Guinier (Å) <sup>a</sup> | $R_g$ , $p(r)$ (Å) <sup>b</sup> | $D_{max}$ (Å) <sup>c</sup> | Porod Volume (Å <sup>3</sup> ) <sup>d</sup> |
|------------------------|---------------|----------------------------------|---------------------------------|----------------------------|---------------------------------------------|
| WT                     | 1.0           | 44.6 ± 0.8                       | 46.4 ± 0.1                      | 160                        | 84,000                                      |
| WT                     | 2.0           | 44.8 ± 1.0                       | 46.3 ± 0.1                      | 160                        | 76,700                                      |
| WT                     | 4.0           | 42.5 ± 0.7                       | 44.5 ± 0.1                      | 160                        | 71,300                                      |
| WT + Mg <sup>2+</sup>  | 1.0           | 45.9 ± 0.2                       | 47.1 ± 0.1                      | 160                        | 70,900                                      |
| WT + Mg <sup>2+</sup>  | 2.0           | 45.1 ± 0.1                       | 47.0 ± 0.1                      | 160                        | 73,500                                      |
| WT + Mg <sup>2+</sup>  | 4.0           | 45.9 ± 0.1                       | 47.3 ± 0.1                      | 160                        | 75,100                                      |
| L8 + Mg <sup>2+</sup>  | 2.0           | 45.9 ± 0.7                       | 48.4 ± 0.1                      | 160                        | 71,500                                      |
| ΔTS + Mg <sup>2+</sup> | 2.0           | 32.7 ± 1.1                       | 33.1 ± 0.1                      | 110                        | 39,700                                      |

<sup>a</sup>Radius of gyration obtained by Guinier analysis.

<sup>b</sup>Radius of gyration obtained from the second moment of the  $p(r)$  distribution using GNOM (10).

<sup>c</sup>Maximum dimension.  $D_{Max}$  was determined by the minimum of  $X^2$  as this parameter was incremented using GNOM (10).

<sup>d</sup>The Porod volume was determined with DATPOROD (11).

## Supporting References

1. Schuck, P. 2000. Size-distribution analysis of macromolecules by sedimentation velocity ultracentrifugation and lamm equation modeling. *Biophys J.* 78: 1606–1619.
2. Launer-Felty, K., C.J. Wong, A.M. Wahid, G.L. Conn, and J.L. Cole. 2010. Magnesium-dependent interaction of PKR with adenovirus VAI. *J Mol Biol.* 402: 638–644.
3. Das, R., A. Laederach, S.M. Pearlman, D. Herschlag, and R.B. Altman. 2005. SAFA: semi-automated footprinting analysis software for high-throughput quantification of nucleic acid footprinting experiments. *RNA.* 11: 344–354.
4. Stafford, W.F., and P.J. Sherwood. 2004. Analysis of heterologous interacting systems by sedimentation velocity: curve fitting algorithms for estimation of sedimentation coefficients, equilibrium and kinetic constants. *Biophys Chem.* 108: 231–243.
5. Franke, D., and D. Svergun. 2009. DAMMIF, a program for rapid ab-initio shape determination in small-angle scattering. *J Appl Crystallogr.* 42: 342–346.
6. Volkov, V., and D. Svergun. 2003. Uniqueness of ab initio shape determination in small-angle scattering. *J Appl Crystallogr.* 36: 860–864.
7. Kozin, M.B., and D.I. Svergun. 2001. Automated matching of high-and low-resolution structural models. *J Appl Crystallogr.* 34: 33–41.
8. Svergun, D., C. Barberato, and M. Koch. 1995. CRY SOL-a program to evaluate X-ray solution scattering of biological macromolecules from atomic coordinates. *J Appl Crystallogr.* 28: 768–773.
9. Trabuco, L.G., E. Villa, K. Mitra, J. Frank, and K. Schulten. 2008. Flexible fitting of atomic structures into electron microscopy maps using molecular dynamics. *Structure/Folding and Design.* 16: 673–683.
10. Semenyuk, A.V., and D.I. Svergun. 1991. GNOM – a program package for small-angle scattering data processing. *J Appl Crystallogr.* 24: 537–540.
11. Petoukhov, M.V., D. Franke, A.V. Shkumatov, G. Tria, A.G. Kikhney, et al. 2012. New developments in the ATSAS program package for small-angle scattering data analysis. *J Appl Crystallogr.* 45: 342–350.
